# Supplementary material for: Durability of Immune Response to ChAdOx1-nCoV-19 Vaccine in Solid Cancer Patients Undergoing Anticancer Treatment
Source: MDPI journal article supplement (doi:10.3390/vaccines10101662), 2022-10-05
Supplement: s1 [file s1]

Figure S1. Consort diagram

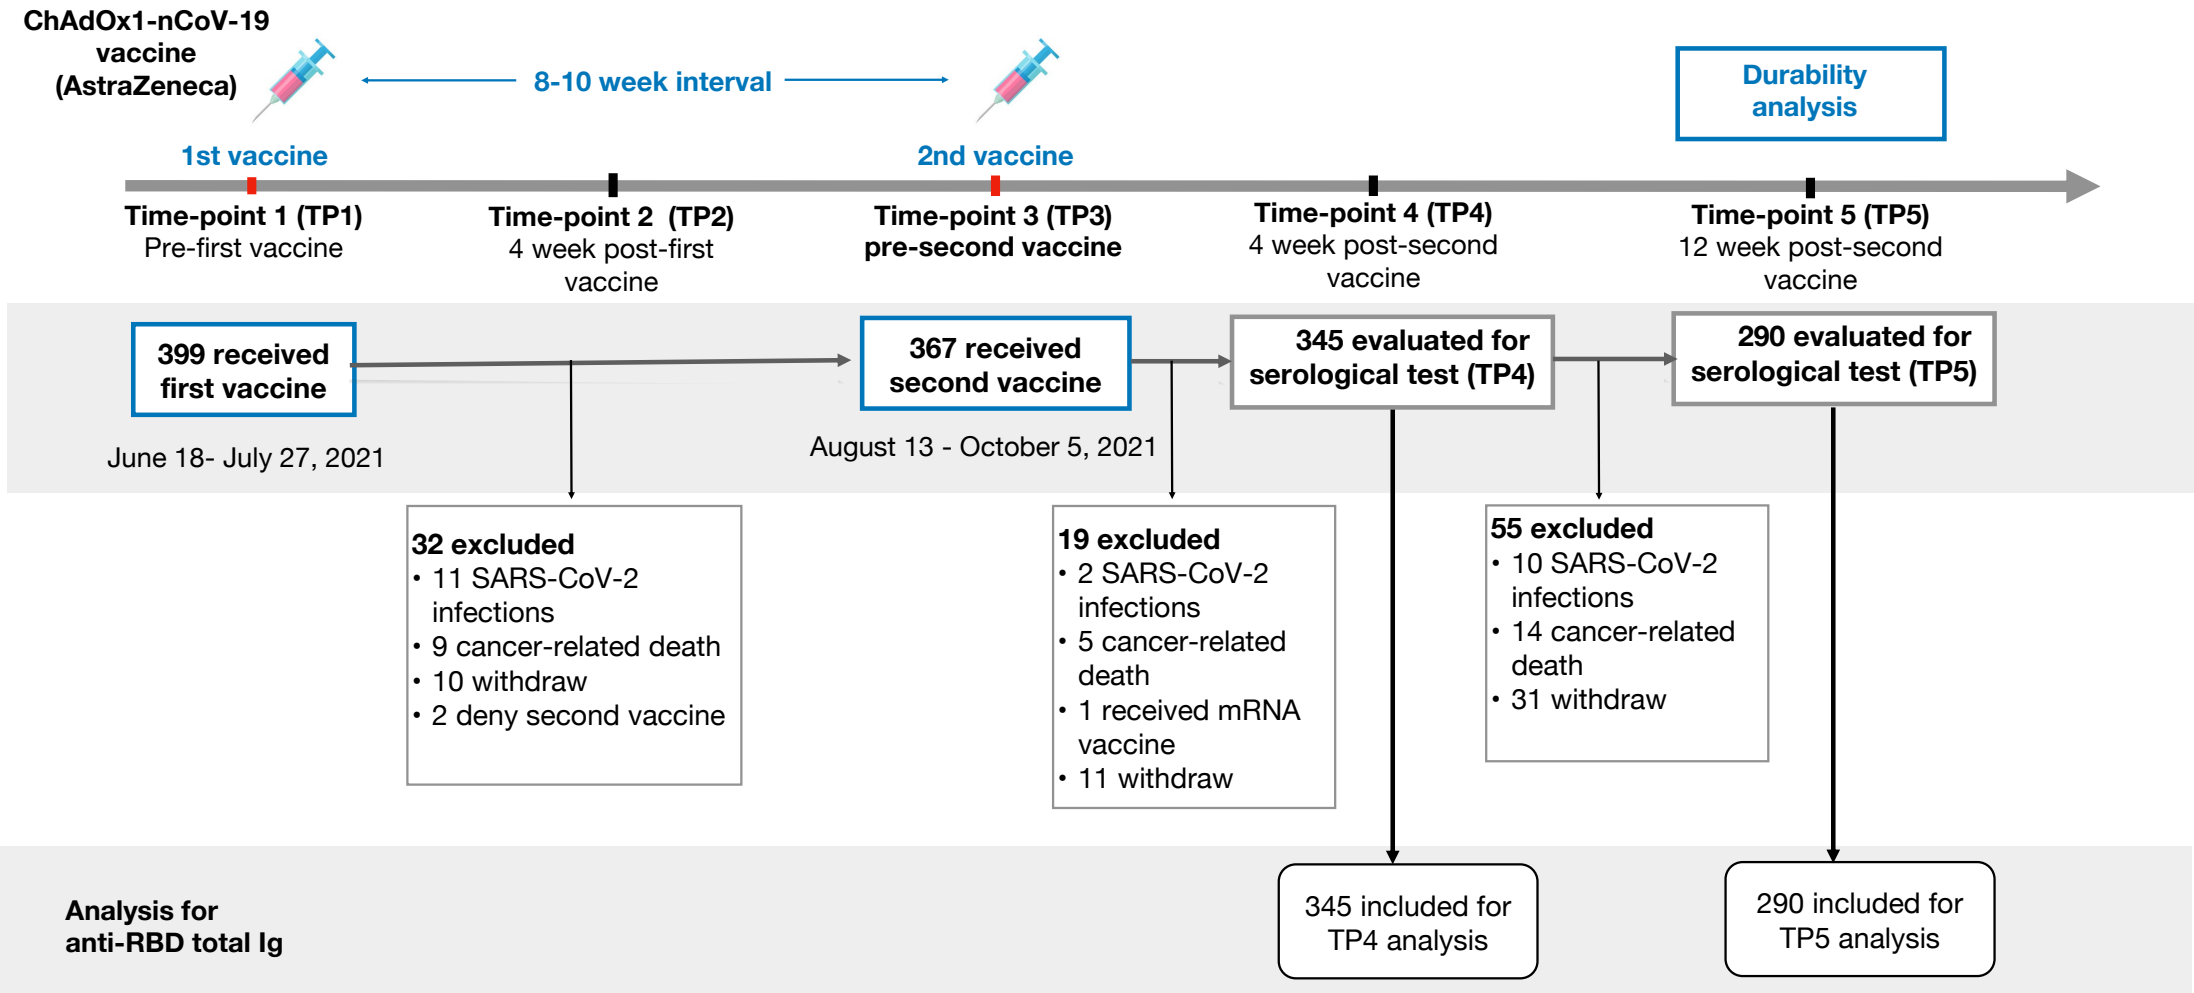

**Figure S2.** Proportion of late titer rising among cancer patients that received immunotherapy, chemotherapy or TKI compared to healthy individuals

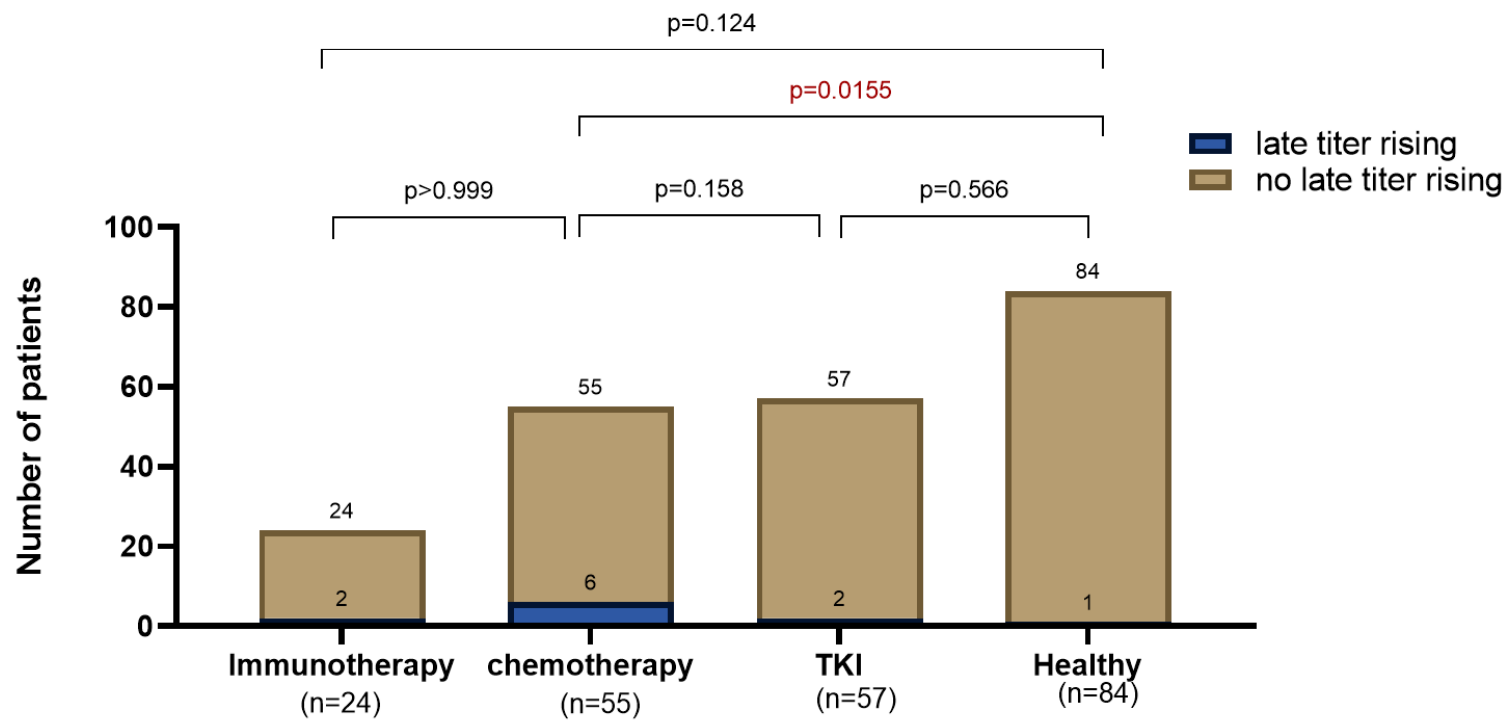

**Figure S3.** Proportion of inadequate response among cancer patients that received immunotherapy, chemotherapy or TKI compared to healthy individuals

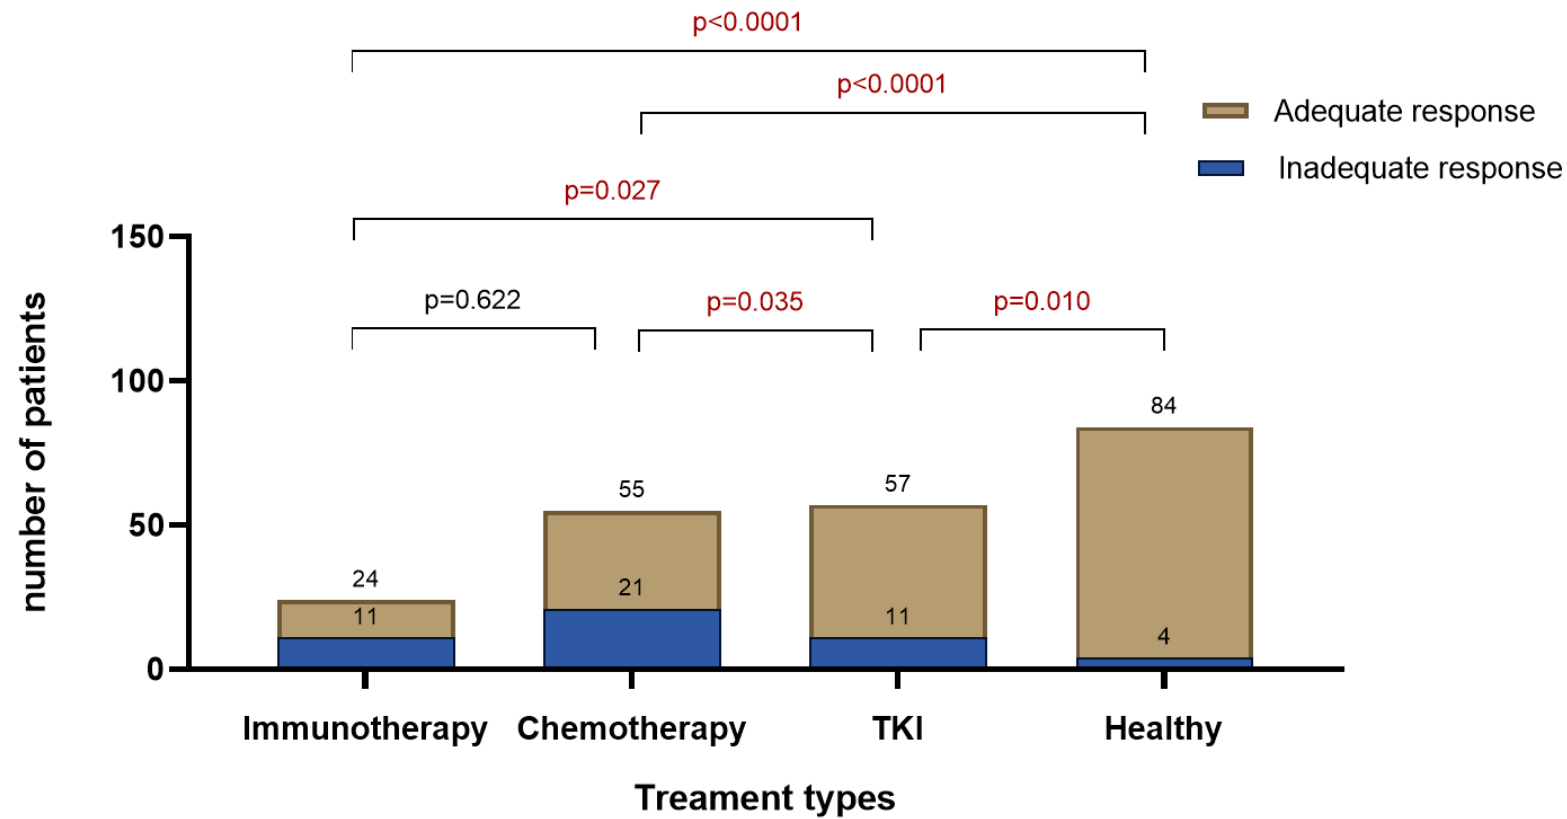

**Table S1 Factors associated with adequate response and inadequate response (Using concentration titer cutoff of 210 U/ml by current FDA Emergency use Authorization guidelines defined for high titer for COVID-19 convalescent plasma)**

| Factors                             | Concentration titer >210 U/ml<br>“Adequate response”<br>(N=212) | Concentration titer <210 U/ml<br>“Non-adequate response”<br>(N=78) | Univariable logistic model on low titer status |           | Multivariable logistic model on low titer status |           |
|-------------------------------------|-----------------------------------------------------------------|--------------------------------------------------------------------|------------------------------------------------|-----------|--------------------------------------------------|-----------|
|                                     |                                                                 |                                                                    | Odds ratio (95% CI)                            | p-value   | Odds ratio (95% CI)                              | p-value   |
| Age (years)                         |                                                                 |                                                                    |                                                |           |                                                  |           |
| <60                                 | 98 (46)                                                         | 34 (44)                                                            | Reference                                      | Reference |                                                  |           |
| ≥60                                 | 114 (54)                                                        | 44 (56)                                                            | 1.11 (0.66, 1.88)                              | 0.689     |                                                  |           |
| Sex                                 |                                                                 |                                                                    |                                                |           |                                                  |           |
| Female                              | 146 (69)                                                        | 40 (51)                                                            | Reference                                      | Reference | Reference                                        | Reference |
| Male                                | 66 (31)                                                         | 38 (49)                                                            | 2.10 (1.24, 3.57)                              | 0.0061    | 1.38 (0.77, 2.46)                                | 0.280     |
| BMI                                 |                                                                 |                                                                    |                                                |           |                                                  |           |
| <18.5                               | 26 (12)                                                         | 10 (13)                                                            | 1.25 (0.54, 2.91)                              | 0.604     |                                                  |           |
| 18.5-22.9                           | 91 (43)                                                         | 28 (36)                                                            | Reference                                      | Reference |                                                  |           |
| 23.0-24.9                           | 35 (17)                                                         | 19 (24)                                                            | 1.76 (0.88, 3.56)                              | 0.112     |                                                  |           |
| ≥25                                 | 60 (28)                                                         | 21 (27)                                                            | 1.14 (0.59, 2.19)                              | 0.699     |                                                  |           |
| ECOG                                |                                                                 |                                                                    |                                                |           |                                                  |           |
| 0-1                                 | 202 (95)                                                        | 72 (92)                                                            | Reference                                      | Reference |                                                  |           |
| 2-3                                 | 10 (5)                                                          | 6 (8)                                                              | 1.68 (0.59, 4.80)                              | 0.330     |                                                  |           |
| Comorbidity                         |                                                                 |                                                                    |                                                |           |                                                  |           |
| No                                  | 118 (56)                                                        | 29 (37)                                                            | Reference                                      | Reference | Reference                                        | Reference |
| Yes                                 | 94 (44)                                                         | 49 (63)                                                            | 2.12 (1.24, 3.62)                              | 0.0057    | 1.90 (1.08, 3.35)                                | 0.026     |
| Cancer type                         |                                                                 |                                                                    |                                                |           |                                                  |           |
| Lung                                | 54 (26)                                                         | 21 (30)                                                            | 1.50 (0.74, 3.03)                              | 0.261     |                                                  |           |
| Breast                              | 77 (37)                                                         | 20 (28)                                                            | Reference                                      | Reference |                                                  |           |
| Colorectal                          | 44 (21)                                                         | 15 (21)                                                            | 1.31 (0.61, 2.82)                              | 0.486     |                                                  |           |
| Upper GI malignancy                 | 13 (6)                                                          | 7 (10)                                                             | 2.07 (0.73, 5.88)                              | 0.170     |                                                  |           |
| Genitourinary                       | 6 (3)                                                           | 3 (4)                                                              | 1.47 (0.57, 3.80)                              | 0.430     |                                                  |           |
| Soft tissue sarcoma and skin cancer | 15 (7)                                                          | 5 (7)                                                              |                                                |           |                                                  |           |
| Treatment type                      |                                                                 |                                                                    |                                                |           |                                                  |           |
| CMT                                 | 99 (47)                                                         | 41 (53)                                                            | 1.64 (0.86, 3.12)                              | 0.132     | 1.67 (0.85, 3.26)                                | 0.133     |
| Immunotherapy                       | 17 (8)                                                          | 18 (23)                                                            | 4.24 (1.81, 9.91)                              | 0.0009    | 3.23 (1.31, 7.94)                                | 0.011     |
| TKI                                 | 57 (27)                                                         | 15 (19)                                                            | Reference                                      | Reference | Reference                                        | Reference |
| CDK4/6 inhibitor                    | 12 (6)                                                          | 2 (3)                                                              |                                                |           |                                                  |           |
| Biologic agent                      | 15 (7)                                                          | 1 (1)                                                              |                                                |           |                                                  |           |
| Anti-hormonal treatment             | 12 (6)                                                          | 1 (1)                                                              | 0.30 (0.06, 1.37)                              | 0.120     | 0.32 (0.07, 1.51)                                | 0.151     |

|                                     |          |         |                   |           |  |  |
|-------------------------------------|----------|---------|-------------------|-----------|--|--|
| Hx treatment interruption/cessation |          |         |                   |           |  |  |
| No                                  | 166 (78) | 61 (78) | Reference         | Reference |  |  |
| Yes                                 | 46 (22)  | 17 (22) | 1.00 (0.54, 1.89) | 0.986     |  |  |
| Steroid use                         |          |         |                   |           |  |  |
| No                                  | 111 (52) | 33 (42) | Reference         | Reference |  |  |
| Yes                                 | 101 (48) | 45 (58) | 1.50 (0.89, 2.53) | 0.130     |  |  |

Data are presented as n (%).

**Table S2 Factors associated with late-rising immune response in oncologic patients**

| Factors                             | Normal<br>(N=240) | Late<br>response<br>(N=50) | Univariable logistic analysis |           | Multivariable logistic analysis |           |
|-------------------------------------|-------------------|----------------------------|-------------------------------|-----------|---------------------------------|-----------|
|                                     |                   |                            | Odds ratio (95% CI)           | p-value   | Odds ratio (95% CI)             | p-value   |
| Age (years)                         |                   |                            |                               |           |                                 |           |
| <60                                 | 107 (45)          | 25 (50)                    | Reference                     | Reference |                                 |           |
| ≥60                                 | 133 (55)          | 25 (50)                    | 0.80 (0.44, 1.48)             | 0.485     |                                 |           |
| Sex                                 |                   |                            |                               |           |                                 |           |
| Female                              | 150 (63)          | 36 (72)                    | Reference                     | Reference |                                 |           |
| Male                                | 90 (38)           | 14 (28)                    | 0.65 (0.33, 1.27)             | 0.205     |                                 |           |
| BMI                                 |                   |                            |                               |           |                                 |           |
| <18.5                               | 32 (13)           | 4 (8)                      | 0.49 (0.16, 1.53)             | 0.223     |                                 |           |
| 18.5-22.9                           | 95 (40)           | 24 (48)                    | Reference                     | Reference |                                 |           |
| 23.0-24.9                           | 47 (20)           | 7 (14)                     | 0.59 (0.24, 1.47)             | 0.256     |                                 |           |
| ≥25                                 | 66 (28)           | 15 (30)                    | 0.90 (0.44, 1.84)             | 0.773     |                                 |           |
| ECOG                                |                   |                            |                               |           |                                 |           |
| 0-1                                 | 228 (95)          | 46 (92)                    | Reference                     | Reference |                                 |           |
| 2-3                                 | 12 (5)            | 4 (8)                      | 1.65 (0.51, 5.35)             | 0.402     |                                 |           |
| Comorbidity                         |                   |                            |                               |           |                                 |           |
| No                                  | 119 (50)          | 28 (56)                    | Reference                     | Reference |                                 |           |
| Yes                                 | 121 (50)          | 22 (44)                    | 0.77 (0.42, 1.43)             | 0.410     |                                 |           |
| Cancer type                         |                   |                            |                               |           |                                 |           |
| Breast                              | 72 (31)           | 25 (56)                    | 3.99 (1.54, 10.33)            | 0.0043    | 1.94 (0.58, 6.53)               | 0.284     |
| Lung                                | 69 (29)           | 6 (13)                     | Reference                     | Reference | Reference                       | Reference |
| Colorectal                          | 49 (21)           | 10 (22)                    | 2.35 (0.80, 6.89)             | 0.120     | 0.84 (0.22, 3.26)               | 0.801     |
| Upper GI malignancy                 | 17 (7)            | 3 (7)                      | 2.03 (0.46, 8.95)             | 0.350     | 1.17 (0.23, 5.89)               | 0.847     |
| Genitourinary                       | 8 (3)             | 1 (2)                      | 0.41 (0.05, 3.57)             | 0.420     | 0.35 (0.04, 3.11)               | 0.346     |
| Soft tissue sarcoma and skin cancer | 20 (9)            | 0 (0)                      |                               |           |                                 |           |
| Treatment type                      |                   |                            |                               |           |                                 |           |
| CMT                                 | 105 (44)          | 36 (72)                    | 4.51 (1.81, 11.24)            | 0.0012    | 4.31 (1.10, 16.96)              | 0.036     |
| Immunotherapy                       | 33 (14)           | 2 (4)                      | 0.80 (0.15, 4.16)             | 0.789     | 1.02 (0.18, 5.69)               | 0.982     |
| TKI                                 | 68 (28)           | 3 (6)                      | 3.43 (1.01, 11.67)            | 0.048     | 1.95 (0.46, 8.22)               | 0.364     |
| CDK4/6 inhibitor                    | 11 (5)            | 3 (6)                      |                               |           |                                 |           |
| Biologic agent                      | 11 (5)            | 5 (10)                     |                               |           |                                 |           |
| Anti-hormonal treatment             | 12 (5)            | 1 (2)                      |                               |           |                                 |           |
| Treatment interruption/cessation    |                   |                            |                               |           |                                 |           |
| No                                  | 190 (79)          | 37 (74)                    | Reference                     | Reference |                                 |           |
| Yes                                 | 50 (21)           | 13 (26)                    | 1.34 (0.66, 2.70)             | 0.421     |                                 |           |
| Steroid use                         |                   |                            |                               |           |                                 |           |
| No                                  | 127 (53)          | 17 (34)                    | Reference                     | Reference | Reference                       | Reference |

|     |          |         |                   |       |                   |       |
|-----|----------|---------|-------------------|-------|-------------------|-------|
| Yes | 113 (47) | 33 (66) | 2.18 (1.15, 4.13) | 0.017 | 0.74 (0.28, 1.96) | 0.559 |
|-----|----------|---------|-------------------|-------|-------------------|-------|

Data are presented as n (%)
